# Supplementary material for: Xyloglucan–Cellulose Nanocrystals Mixtures: A Case Study of Nanocolloidal Hydrogels and Levers for Tuning Functional Properties
Source: MDPI journal article supplement (doi:10.3390/gels10050334), 2024-05-15
Supplement: s1 [file s1]

# Xyloglucan-cellulose nanocrystals mixtures: a case study of nanocolloidal hydrogels and levers for tuning functional properties

Géraldine Rangel<sup>1</sup>, Céline Moreau<sup>1</sup>, Ana Villares<sup>1</sup>, Christophe Chassenieux<sup>2</sup>, Bernard Cathala<sup>1\*</sup>

## Supplementary information

1 UR1268 BIA, INRAE, 44300, Nantes, France

2 IMMM UMR CNRS6283, Le Mans Université, Avenue Olivier Messiaen, 72085 le Mans France

\* : corresponding author

email : [Bernard.cathala@inrae.fr](mailto:Bernard.cathala@inrae.fr)

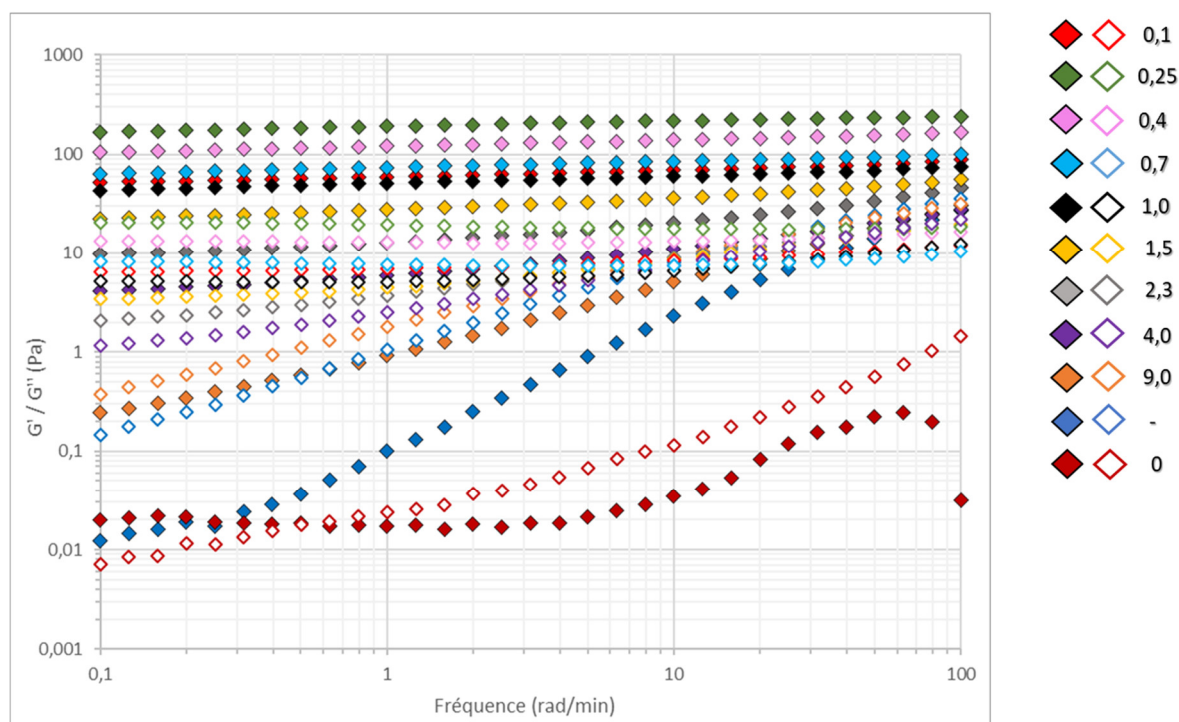

**Figure S1.** Frequency sweeps for the different mixtures at 20 g/L covering all range of XG/CNC ratio explored.  $G'$  (full diamonds),  $G''$  (empty diamonds).
